# Supplementary material
Source: HighWire-hosted journal article supplement (https://gut.bmj.com/content/70/4/733)

## Supplementary methods

### Clinical evaluation

The clinical evaluation and management of severe acute respiratory syndrome (SARS) patients back in 2003 were described in details in our previous publications.[1, 2] All Coronavirus disease 2019 (COVID-19) patients were admitted to medical wards or intensive care units with isolation facilities. Initial investigations included a complete blood count (with a differential count), clotting profile (prothrombin time, activated partial-thromboplastin time, international normalised ratio [INR]) and serum biochemical measurements (electrolytes, renal and liver biochemistries, C-reactive protein and lactate dehydrogenase, glucose and procalcitonin). These laboratory assessments and chest radiography were performed regularly as clinically indicated. A real-time reverse-transcriptase polymerase chain reaction (RT-PCR) assay was used to detect a conserved region in the E gene of SARS-coronavirus (CoV) and SARS-CoV-2 as well as other bat-associated SARS-related viruses (*Sarbecovirus*) as screening.[3] All positive samples were sent out to Public Health Laboratory Services Branch Centre For Health Protection, Department Of Health for confirmation by real-time RT-PCR targeting at SAR-CoV-2 specific RNA-dependent-RNA-polymerase gene region. Microbiological workup, including sputum and blood bacterial culture, nasopharyngeal aspirate for respiratory viruses and atypical pathogens, and urine for *Streptococcus pneumoniae* and *Legionella* antigen tests, were performed as appropriate.

### Clinical management of COVID-19

Antibacterial therapy, using a beta-lactam-beta-lactamase inhibitor, or third generation cephalosporin with or without a macrolide or doxycycline, was initiated if bacterial infection is suspected or confirmed.[4] Supportive therapy, including supplemental oxygen, intravenous

fluid, vasopressor support, mechanical ventilation, and renal replacement therapy, were given as appropriate. For COVID-19, patients were either recruited into clinical trials (NCT04276688, NCT04292730, NCT04292899), or started lopinavir-ritonavir (Kaletra® 200mg/50mg) monotherapy or in combination with ribavirin (400mg twice daily) for up to 14 days, and/or interferon beta-1b, according to local interim guidelines. Systemic corticosteroids were not given routinely, but in selected patients, e.g. those with refractory shock. Patients were discharged when they improved clinically and with two consecutive clinical specimens tested negative for SARS-CoV-2.

## References

- 1 Lee N, Hui D, Wu A, Chan P, Cameron P, Joynt GM, *et al.* A major outbreak of severe acute respiratory syndrome in Hong Kong. *N Engl J Med* 2003;**348**:1986-94.
- 2 Sung JJ, Wu A, Joynt GM, Yuen KY, Lee N, Chan PK, *et al.* Severe acute respiratory syndrome: report of treatment and outcome after a major outbreak. *Thorax* 2004;**59**:414-20.
- 3 Zhu N, Zhang D, Wang W, Li X, Yang B, Song J, *et al.* A Novel Coronavirus from Patients with Pneumonia in China, 2019. *N Engl J Med* 2020;**382**:727-33.
- 4 Ho PL, Wu TC. Reducing bacterial resistance with IMPACT – Interhospital Multi-disciplinary Programme on Antimicrobial ChemoTherapy, 5th Edition 2017. Website: [https://www.chp.gov.hk/files/pdf/reducing\\_bacterial\\_resistance\\_with\\_impact.pdf](https://www.chp.gov.hk/files/pdf/reducing_bacterial_resistance_with_impact.pdf). Accessed on 29 April 2020.

Supplementary Table 1. List of diagnosis codes and/or virological assays to define severe acute respiratory syndrome (SARS) and coronavirus disease 2019 (COVID-19).

| <b>Disease</b>                      | <b>ICD-9-CM Code</b>                                       | <b>All Diagnosis Description</b>        |
|-------------------------------------|------------------------------------------------------------|-----------------------------------------|
| <b>SARS</b>                         | 465.9                                                      | SARS - upper respiratory (465.9:2)      |
|                                     | 466.0                                                      | SARS - acute bronchitis (466.0:1)       |
|                                     | 480.8                                                      | SARS with atypical pneumonia (480.8:2)  |
|                                     | 480.8                                                      | Pneumonia due to coronavirus (480.8:1)  |
|                                     | 486                                                        | Atypical pneumonia (486:1)              |
|                                     | V67.59                                                     | SARS follow up (V67.59:1)               |
| <b>COVID-19</b>                     | 079.89                                                     | Infection due to coronavirus (079.89:3) |
|                                     | 480.8                                                      | Pneumonia due to coronavirus (480.8:1)  |
| <b>Virological Test Description</b> |                                                            |                                         |
| <b>SARS</b>                         | Test for Severe Respiratory Syndrome (SRS) agent by RT-PCR |                                         |
| <b>COVID-19</b>                     | 2019 novel Coronavirus (2019-nCoV) PCR                     |                                         |
|                                     | RT-PCR for Novel coronavirus (Novel CoV) RNA               |                                         |
|                                     | Novel coronavirus (Novel-CoV) RNA                          |                                         |
|                                     | Xpert RT-PCR for SARS-CoV-2 RNA                            |                                         |

COVID-19 = coronavirus disease 2019, ICD-9-CM = International Classification of Diseases, Ninth Revision, Clinical Modification, RT-PCR = Reverse transcription polymerase chain reaction, SARS = severe acute respiratory syndrome.

Supplementary Table 2. Medications used in Hospital Authority internally.

| Drug code               | Name                       | Dosage                                               |
|-------------------------|----------------------------|------------------------------------------------------|
| <b>Antiviral</b>        |                            |                                                      |
| KALE02/03               | Kaletra (or equiv)         | 200 MG / 50 MG                                       |
| OSEL01/04/05/10/14      | Oseltamivir (phosphate)    | 30 MG, 40 MG, 75 MG, 6MG/ML                          |
| RIBA06/09               | Ribavirin                  | 200 MG, 100MG/ML                                     |
| <b>Antibiotics</b>      |                            |                                                      |
| AUGM01/02/04/05/06/08   | Augmentin (or equiv)       | 375MG, 156MG/5ML, 1.2G<br>1G, 457MG/5ML, 642.9MG/5ML |
| AZIT02/03/04            | Azithromycin               | 200MG/5ML, 500MG, 250MG                              |
| CEFA08                  | Cefazolin (sodium)         | 1G                                                   |
| CEFE04                  | Cefepime hcl               | 1G                                                   |
| CEFO04                  | Cefotaxime (sodium)        | 1G                                                   |
| CEFP01                  | Cefpodoxime (proxetil)     | 100MG                                                |
| CEFT01/02               | Ceftazidime                | 500MG, 1G                                            |
| CEFT14                  | Ceftriaxone disodium       | 1G                                                   |
| CEFU02/04/07            | Cefuroxime (sodium)        | 750MG, 250MG,<br>125MG/5ML                           |
| LEVO09/10/14/15/18      | Levofloxacin               | 100MG, 0.2G/ML,<br>330MG, 5MG/ML, 250MG              |
| CIPR01                  | Ciprofloxacin (hcl)        | 250MG, 2MG/ML                                        |
| MERO01/02               | Meropenem                  | 500MG, 1G                                            |
| ERTA01                  | Ertapenem                  | 1G                                                   |
| ERYT03/05, NOT 01       | Erythromycin               | 200MG/5ML, 250MG                                     |
| COTR01                  | Cotrimoxazole              | 480MG, 240MG/5ML                                     |
| <b>Antifungal</b>       |                            |                                                      |
| NYST02                  | Nystatin                   | 100000U/ML                                           |
| FLUC02/03/05/06         | Fluconazole                | 50MG, 150MG<br>2MG/ML, 50MG/5ML                      |
| ITRA01                  | Itraconazole               | 100MG                                                |
| <b>Corticosteroid</b>   |                            |                                                      |
| METH30                  | Methylprednisolone         | 500MG                                                |
| PRED01/02/19/29         | Prednisolone               | 1MG, 5MG<br>25MG, 5MG/ML<br>20MG, 100MG              |
| HYDR06/07/25/26/30/38   | Hydrocortisone             | 10MG, 25MG<br>25MG, 2MG/ML                           |
| <b>Immunomodulators</b> |                            |                                                      |
| NORM15/20/21            | Intravenous immunoglobulin | 60G/L, 50MG/ML                                       |
| INTE20                  | Interferon beta-1b         | 8MIU (250MCG)/ML                                     |

Supplementary Table 3. ICD-9-CM diagnosis and procedure codes for hypertension, hepatic complications, liver cirrhosis, hepatocellular carcinoma, and liver failure.

| Disease                                              | ICD-9-CM Code | Description                                                                                                 |
|------------------------------------------------------|---------------|-------------------------------------------------------------------------------------------------------------|
| <b>Hypertension</b>                                  |               |                                                                                                             |
| Hypertension                                         | 401           | Essential hypertension                                                                                      |
| Hypertension                                         | 402           | Hypertensive heart disease                                                                                  |
| Hypertension                                         | 403           | Hypertensive chronic kidney disease                                                                         |
| Hypertension                                         | 404           | Hypertensive heart and chronic kidney disease                                                               |
| <b>Hepatic complications/ Liver-related outcomes</b> |               |                                                                                                             |
| Ascites                                              | 789.5         | Ascites                                                                                                     |
| SBP                                                  | 567.2:9       | Spontaneous bacterial peritonitis                                                                           |
| EVB *                                                | 456.0         | Esophageal varices with bleeding                                                                            |
| EVB                                                  | 456.20        | Esophageal varices classified elsewhere with bleeding                                                       |
| GVB *                                                | 456.8:1       | Fundal varices, bleeding                                                                                    |
| GVB                                                  | 456.8:2       | Bleeding gastric varices                                                                                    |
| HE                                                   | 348.3         | Encephalopathy, unspecified                                                                                 |
| HE                                                   | 349.82        | Toxic encephalopathy                                                                                        |
| HE                                                   | 572.2         | Hepatic coma                                                                                                |
| HRS                                                  | 572.4         | Hepatorenal syndrome                                                                                        |
| Portal hypertension                                  | 572.3         | Portal hypertension                                                                                         |
| Varices                                              | 456.1         | Esophageal varices without bleeding                                                                         |
| Varices                                              | 456.21        | Esophageal varices in diseases classified elsewhere without bleeding                                        |
| Varices                                              | 456.8:4       | Fundal varices                                                                                              |
| Varices                                              | 456.8:5       | Gastric varices                                                                                             |
| <b>Liver cirrhosis</b>                               |               |                                                                                                             |
| Liver cirrhosis                                      | 571.2         | Alcoholic cirrhosis of liver                                                                                |
| Liver cirrhosis                                      | 571.5         | Cirrhosis of liver without mention of alcohol                                                               |
| <b>Hepatocellular carcinoma (HCC)</b>                |               |                                                                                                             |
| HCC                                                  | 155.0         | Malignant neoplasm of liver, primary                                                                        |
| HCC                                                  | 155.2         | Malignant neoplasm of liver, not specified                                                                  |
| <b>Liver failure</b>                                 |               |                                                                                                             |
| Liver failure                                        | 570           | Acute and subacute necrosis of liver                                                                        |
| <b>Hepatitis</b>                                     |               |                                                                                                             |
| Chronic hepatitis B                                  | 070.22        | Chronic viral hepatitis B with hepatic coma without hepatitis delta                                         |
| Chronic hepatitis B                                  | 070.23        | Chronic viral hepatitis B with hepatic coma with hepatitis delta                                            |
| Chronic hepatitis B                                  | 070.32        | Chronic viral hepatitis B without mention of hepatic coma without mention of hepatitis delta                |
| Chronic hepatitis B                                  | 070.33        | Chronic viral hepatitis B without mention of hepatic coma with hepatitis delta                              |
| Chronic hepatitis B                                  | V02.61        | Hepatitis B carrier                                                                                         |
| Acute hepatitis B                                    | 070.20        | Viral hepatitis B with hepatic coma, acute or unspecified, without mention of hepatitis delta               |
| Acute hepatitis B                                    | 070.21        | Viral hepatitis B with hepatic coma, acute or unspecified, with hepatitis delta                             |
| Acute hepatitis B                                    | 070.30        | Viral hepatitis B without mention of hepatic coma, acute or unspecified, without mention of hepatitis delta |
| Acute hepatitis B                                    | 070.31        | Viral hepatitis B without mention of hepatic coma, acute or unspecified, with hepatitis delta               |
| Hepatitis C                                          | 070.41        | Acute hepatitis C with hepatic coma                                                                         |

|             |        |                                                                                 |
|-------------|--------|---------------------------------------------------------------------------------|
| Hepatitis C | 070.44 | Chronic hepatitis C with hepatic coma                                           |
| Hepatitis C | 070.51 | Acute hepatitis C without mention of hepatic coma                               |
| Hepatitis C | 070.54 | Chronic hepatitis C without mention of hepatic coma                             |
| Hepatitis C | V02.62 | Hepatitis C carrier                                                             |
| Hepatitis D | 070.23 | Chronic viral hepatitis B with hepatic coma with hepatitis delta                |
| Hepatitis D | 070.33 | Chronic viral hepatitis B without mention of hepatic coma with hepatitis delta  |
| Hepatitis D | 070.42 | Hepatitis delta without mention of active hepatitis B disease with hepatic coma |
| Hepatitis D | 070.52 | Hepatitis delta without mention of active hepatitis B disease or hepatic coma   |

\* Esophageal or gastric variceal bleeding was also defined by the ICD-9-CM procedure codes of 42.33:3, 42.33:6, 42.33:13, and 43.41:1.

Abbreviations: EVB = esophageal variceal bleeding; GVB = gastric variceal bleeding, HCC = hepatocellular carcinoma, HE = hepatic encephalopathy, HRS = hepatorenal syndrome, ICD-9-CM = International Classification of Diseases, Ninth Revision, Clinical Modification, SBP = spontaneous bacterial peritonitis.

Supplementary Table 4. Liver-related outcomes during coronavirus infection.

| Clinical outcomes                 | SARS-CoV *<br>N = 1,665 | SARS-CoV-2<br>N = 489 | HCoV-229E<br>N = 127 | HCoV-HKU1<br>N = 117 | HCoV-NL63<br>N = 56 | HCoV-OC43<br>N = 385 |
|-----------------------------------|-------------------------|-----------------------|----------------------|----------------------|---------------------|----------------------|
| Any hepatic events                | 19 (1.1)                | 0 (0)                 | 2 (0.8)              | 1 (0.9)              | 1 (1.8)             | 1 (0.3)              |
| Time to hepatic events (days) #   | 16 (8-20)               | -                     | 0                    | 3.5 (1-6)            | 0                   | 0                    |
| Liver failure ^                   | 16 (1.0)                | 0 (0)                 | 2 (1.6)              | 2 (1.7)              | 1 (1.8)             | 1 (0.3)              |
| Hepatocellular carcinoma          | 1 (0.1)                 | 0 (0)                 | 0 (0)                | 0 (0)                | 0 (0)               | 0 (0)                |
| Ascites                           | 1 (0.1)                 | 0 (0)                 | 0 (0)                | 0 (0)                | 0 (0)               | 0 (0)                |
| Nonbleeding varices               | 0 (0)                   | 0 (0)                 | 0 (0)                | 0 (0)                | 0 (0)               | 0 (0)                |
| Variceal bleeding                 | 0 (0)                   | 0 (0)                 | 0 (0)                | 0 (0)                | 0 (0)               | 0 (0)                |
| Hepatic encephalopathy            | 2 (0.1)                 | 0 (0)                 | 0 (0)                | 0 (0)                | 0 (0)               | 0 (0)                |
| Hepatorenal syndrome              | 0 (0)                   | 0 (0)                 | 0 (0)                | 0 (0)                | 0 (0)               | 0 (0)                |
| Spontaneous bacterial peritonitis | 0 (0)                   | 0 (0)                 | 0 (0)                | 0 (0)                | 0 (0)               | 0 (0)                |
| Liver-related death               | 2 (0.1)                 | 0 (0)                 | 0 (0)                | 0 (0)                | 0 (0)               | 0 (0)                |

\* Five patients were not included due to history of hepatic events before SARS-CoV infection.

# Presented in median (range), or the exact time if there was only one event.

^ Liver failure was defined by diagnosis codes and/or serum total bilirubin  $\geq 2$ x upper limit of normal and INR  $\geq 2$ . The upper limit of normal of total bilirubin was 19  $\mu\text{mol/L}$ .

HCoV = human coronavirus; SARS = severe acute respiratory syndrome.

Supplementary Table 5. Comparison of peak alanine aminotransferase (ALT)/ aspartate aminotransferase (AST) of 816 COVID-19 patients who had serial measurement of liver biochemistries with and with invasive mechanical ventilation.

| <b>Age &lt;50 years</b>                                                                                           | <b>Without invasive mechanical ventilation<br/>N=544</b> | <b>With invasive mechanical ventilation<br/>N=7</b>  | <b>P value</b> |
|-------------------------------------------------------------------------------------------------------------------|----------------------------------------------------------|------------------------------------------------------|----------------|
| Peak ALT/AST (U/L)                                                                                                | 33 (22-61)                                               | 209 (72-299)                                         | <0.001         |
| Peak total bilirubin (μmol/L)                                                                                     | 18 (12-27)                                               | 43 (27-44)                                           | 0.001          |
| <b>Age ≥50 years</b>                                                                                              | <b>Without invasive mechanical ventilation<br/>N=250</b> | <b>With invasive mechanical ventilation<br/>N=15</b> | <b>P value</b> |
| Peak ALT/AST (U/L)                                                                                                | 48 (31-87)                                               | 137 (76-252)                                         | <0.001         |
| Peak total bilirubin (μmol/L)                                                                                     | 21 (14-29)                                               | 28 (14-71)                                           | 0.020          |
| <b>With diabetes mellitus</b>                                                                                     | <b>Without invasive mechanical ventilation<br/>N=61</b>  | <b>With invasive mechanical ventilation<br/>N=15</b> | <b>P value</b> |
| Peak ALT/AST (U/L)                                                                                                | 52 (37-115)                                              | 100 (72-252)                                         | 0.042          |
| Peak total bilirubin (μmol/L)                                                                                     | 22 (17-33)                                               | 35 (27-71)                                           | 0.007          |
| <b>Without diabetes mellitus</b>                                                                                  | <b>Without invasive mechanical ventilation<br/>N=733</b> | <b>With invasive mechanical ventilation<br/>N=7</b>  | <b>P value</b> |
| Peak ALT/AST (U/L)                                                                                                | 35 (23-67)                                               | 209 (117-299)                                        | <0.001         |
| Peak total bilirubin (μmol/L)                                                                                     | 19 (13-27)                                               | 26 (22-44)                                           | 0.049          |
| <b>With hypertension</b>                                                                                          | <b>Without invasive mechanical ventilation<br/>N=116</b> | <b>With invasive mechanical ventilation<br/>N=14</b> | <b>P value</b> |
| Peak ALT/AST (U/L)                                                                                                | 52 (33-109)                                              | 185 (105-264)                                        | <0.001         |
| Peak total bilirubin (μmol/L)                                                                                     | 20 (13-29)                                               | 31 (14-76)                                           | 0.018          |
| <b>Without hypertension</b>                                                                                       | <b>Without invasive mechanical ventilation<br/>N=678</b> | <b>With invasive mechanical ventilation<br/>N=8</b>  | <b>P value</b> |
| Peak ALT/AST (U/L)                                                                                                | 35 (23-66)                                               | 85 (72-314)                                          | 0.001          |
| Peak total bilirubin (μmol/L)                                                                                     | 19 (13-27)                                               | 34 (27-43)                                           | 0.001          |
| <b>Duration of COVID-19 &lt;7 days at peak ALT/AST or at the start of invasive mechanical ventilation</b>         | <b>Without invasive mechanical ventilation<br/>N=406</b> | <b>With invasive mechanical ventilation<br/>N=17</b> | <b>P value</b> |
| Peak ALT/AST (U/L)                                                                                                | 31 (22-51)                                               | 171 (72-276)                                         | <0.001         |
| <b>Duration of COVID-19 ≥7 days at peak ALT/AST or at the start of invasive mechanical ventilation</b>            | <b>Without invasive mechanical ventilation<br/>N=388</b> | <b>With invasive mechanical ventilation<br/>N=5</b>  | <b>P value</b> |
| Peak ALT/AST (U/L)                                                                                                | 49 (29-97)                                               | 137 (88-530)                                         | 0.008          |
| <b>Duration of COVID-19 &lt;7 days at peak total bilirubin or at the start of invasive mechanical ventilation</b> | <b>Without invasive mechanical ventilation<br/>N=518</b> | <b>With invasive mechanical ventilation<br/>N=17</b> | <b>P value</b> |
| Peak ALT/AST (U/L)                                                                                                | 20 (13-29)                                               | 34 (25-81)                                           | <0.001         |
| <b>Duration of COVID-19 ≥7 days at peak total bilirubin or at the start of invasive mechanical ventilation</b>    | <b>Without invasive mechanical ventilation<br/>N=276</b> | <b>With invasive mechanical ventilation<br/>N=5</b>  | <b>P value</b> |
| Peak ALT/AST (U/L)                                                                                                | 18 (12-24)                                               | 33 (13-37)                                           | 0.232          |



Peak ALT/AST and total bilirubin between COVID-19 patients with and with invasive mechanical ventilation were compared by Mann-Whitney *U* test.  
COVID-19 = Coronavirus disease 2019.

Supplementary Table 6. Univariate and multivariable analysis with logistic regression on factors associated with alanine aminotransferase (ALT) and/or aspartate aminotransferase (AST) elevation with total bilirubin elevation and/or raised international normalised ratio (INR) in patients infected by SARS-CoV-2.

| Parameters                                          | Univariate analysis |         | Multivariable analysis |         |
|-----------------------------------------------------|---------------------|---------|------------------------|---------|
|                                                     | OR (95% CI)         | P value | aOR (95% CI)           | P value |
| <b>Use of antiviral agents</b>                      |                     |         |                        |         |
| - No use of antiviral agents                        | Not available*      |         | Not available          |         |
| - Lopinavir-ritonavir ± ribavirin                   |                     |         |                        |         |
| - Lopinavir-ritonavir ± ribavirin + interferon beta |                     |         |                        |         |
| <b>Use of corticosteroid</b>                        | 6.98 (4.00-12.19)   | <0.001  | 4.76 (1.56-14.50)      | 0.006   |
| <b>Age</b>                                          | 1.07 (1.04-1.11)    | <0.001  | 1.04 (1.00-1.09)       | 0.039   |
| <b>Male gender</b>                                  | 3.63 (1.02-12.96)   | 0.047   |                        |         |
| <b>Diabetes mellitus</b>                            | 9.28 (3.27-26.37)   | <0.001  |                        |         |
| <b>Hypertension</b>                                 | 15.76 (4.94-50.32)  | <0.001  | 5.21 (1.41-19.16)      | 0.013   |

ALT and/or AST elevation with total bilirubin elevation and/or raised INR was defined by ALT and/or AST  $\geq 2$ x upper limit of normal (ULN) with total bilirubin  $\geq 2$ xULN and/or INR  $\geq 1.7$  at baseline or during follow-up. The upper limit of normal of ALT and AST were 40 U/L. The ULN of total bilirubin was 19  $\mu\text{mol/L}$ .

\* Odds ratio was no available as acute liver injury occurred in 9 (2.8%), 6 (2.1%), and 0 (0%) of patients who used lopinavir-ritonavir ± ribavirin + interferon beta, lopinavir-ritonavir ± ribavirin, and those who did not used these antiviral agents (Chi-square test for linear trend,  $P=0.027$ ).

$P$  value = 0.418 for Hosmer-Lemeshow goodness-of-fit test, which did not indicate significant poor fit.

aOR = adjusted odds ratio; CI = confidence interval; CoV = coronavirus; SARS = severe acute respiratory syndrome.

Supplementary Figure 1. Serial serum alanine aminotransferase (ALT) of patients infected with A. SARS-CoV; B. SARS-CoV-2; and C. other HCoV. ALT=alanine aminotransferase, HCoV = human coronavirus, SARS = severe acute respiratory syndrome, ULN = upper limit of normal.

A.

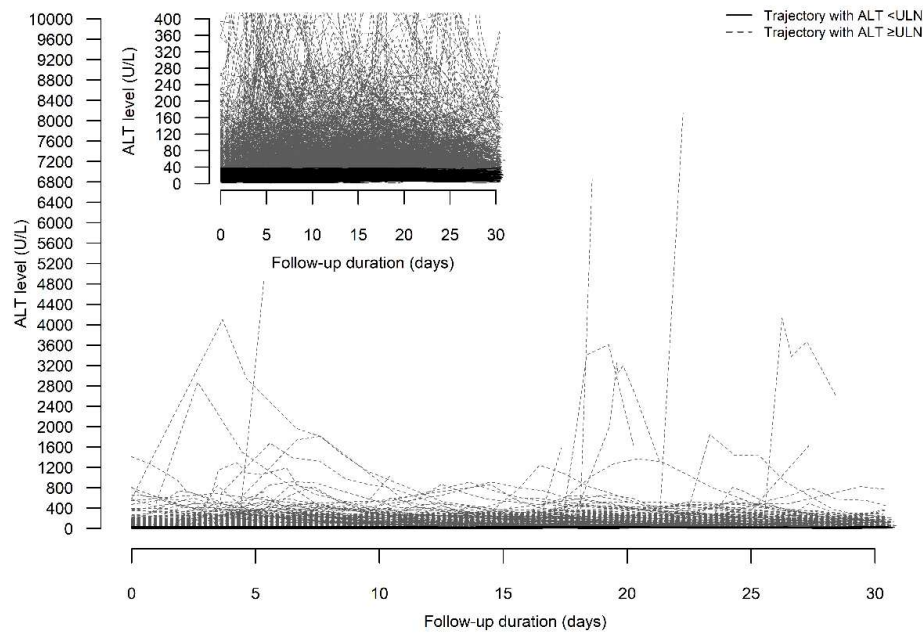

B.

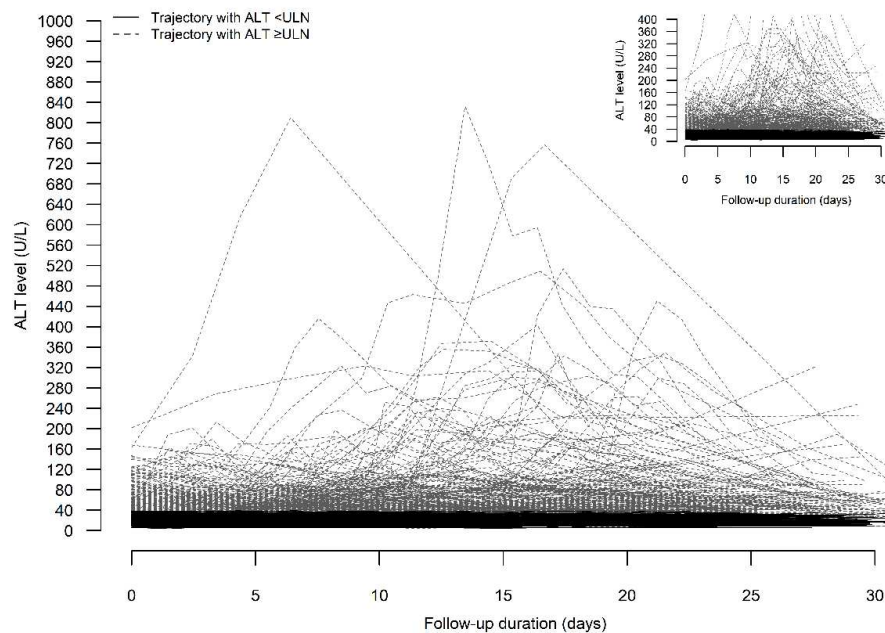

C.

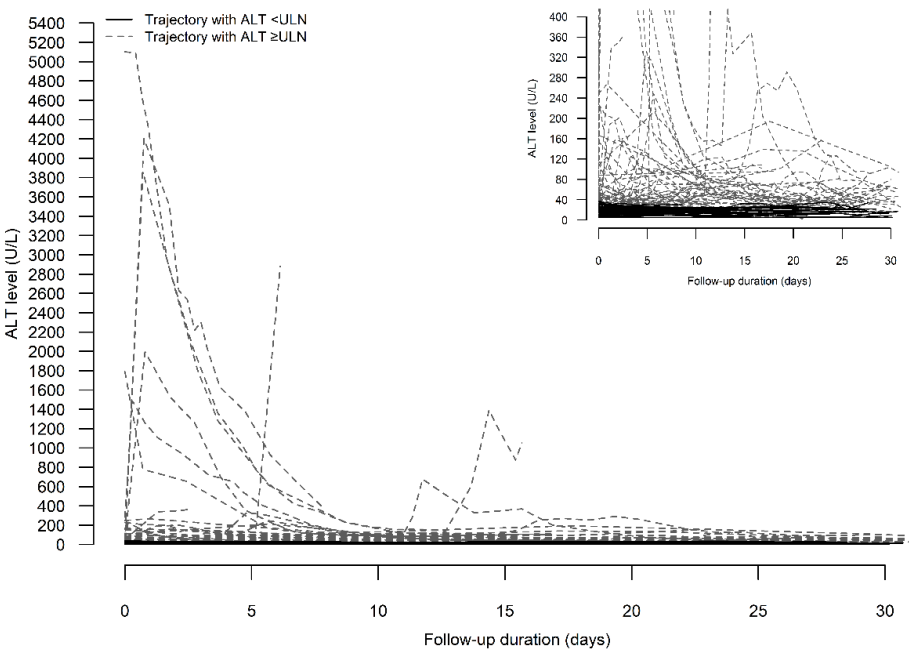

Supplementary Figure 2. Serial serum alanine aminotransferase (ALT) of patients infected with SARS-CoV-2 with reference to the time of A. first positive RT-PCR test of SARS-CoV-2; and B. first negative RT-PCR test of SARS-CoV-2.

CoV = coronavirus, RT-PCR = reverse transcription polymerase chain reaction, SARS = severe acute respiratory syndrome.

A.

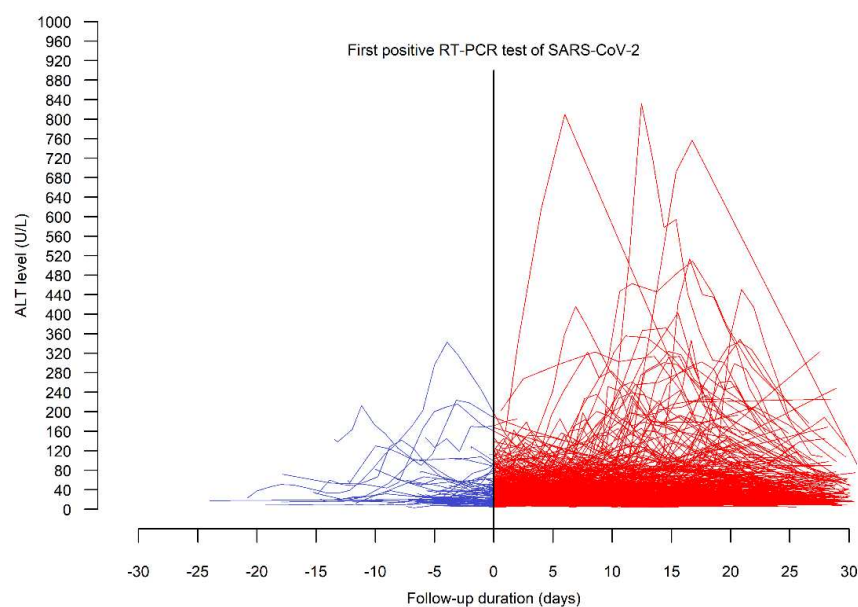

B.

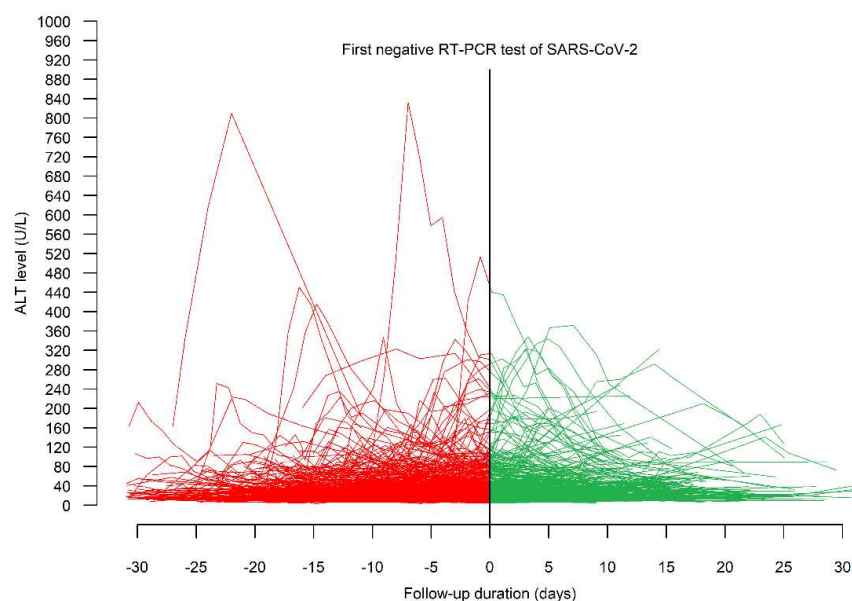

Supplementary Figure 3. Serial serum total bilirubin of patients infected with A. SARS-CoV; B. SARS-CoV-2; and C. other HCoV. HCoV = human coronavirus, SARS = severe acute respiratory syndrome, ULN = upper limit of normal.

A.

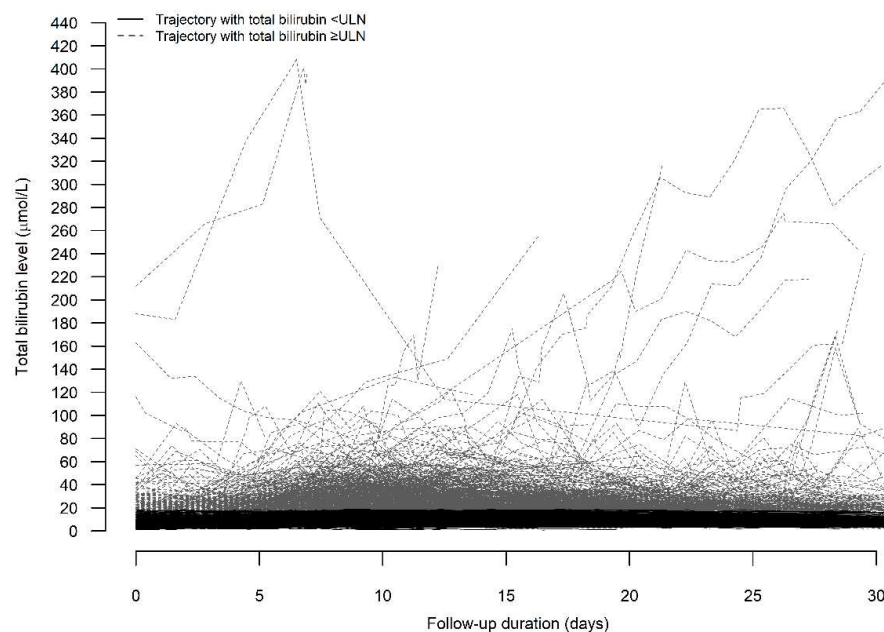

B.

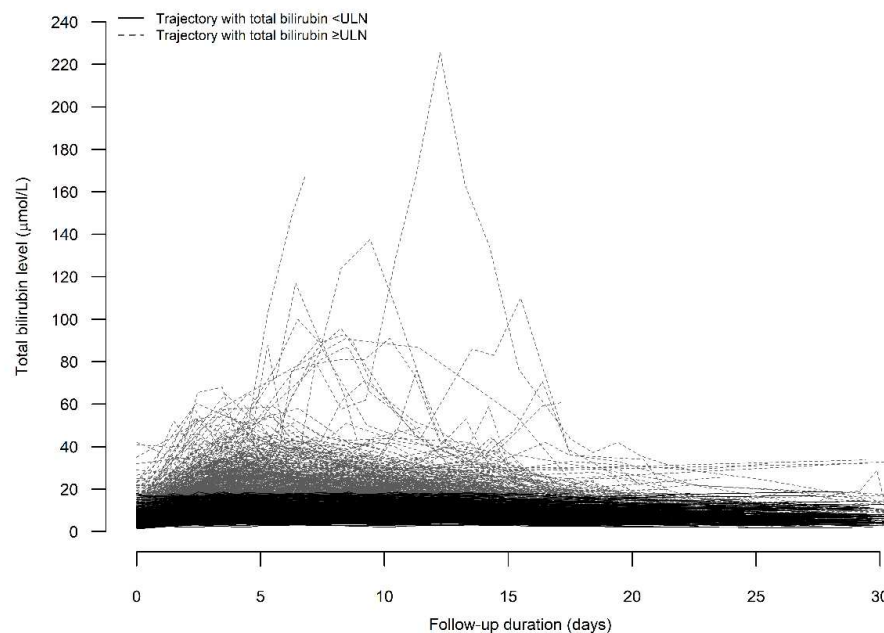

C.

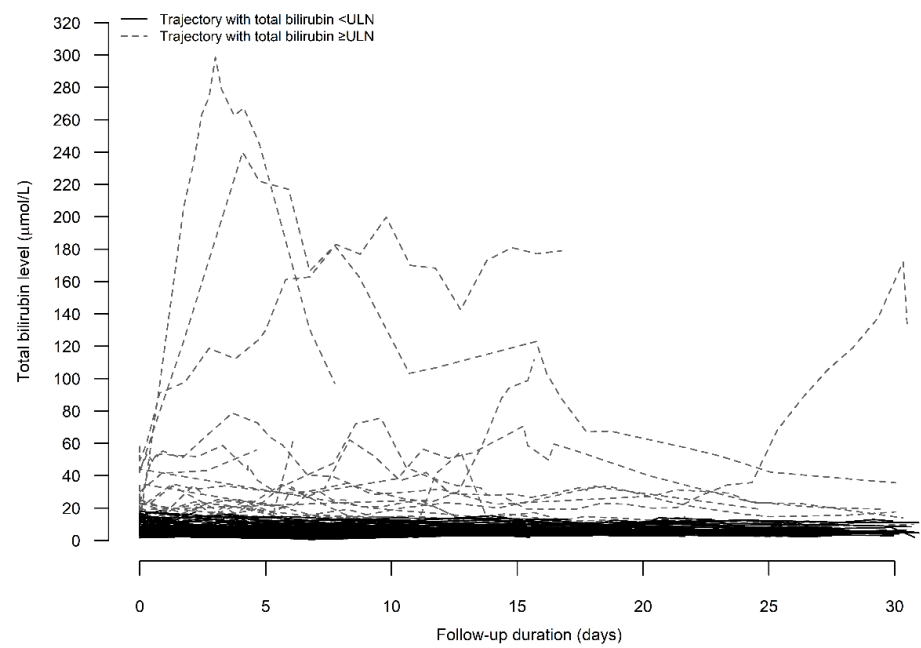

Supplementary Figure 4. Serial serum total bilirubin of patients infected with SARS-CoV-2 with reference to the time of A. first positive RT-PCR test of SARS-CoV-2; and B. first negative RT-PCR test of SARS-CoV-2.

CoV = coronavirus, RT-PCR = reverse transcription polymerase chain reaction, SARS = severe acute respiratory syndrome.

A.

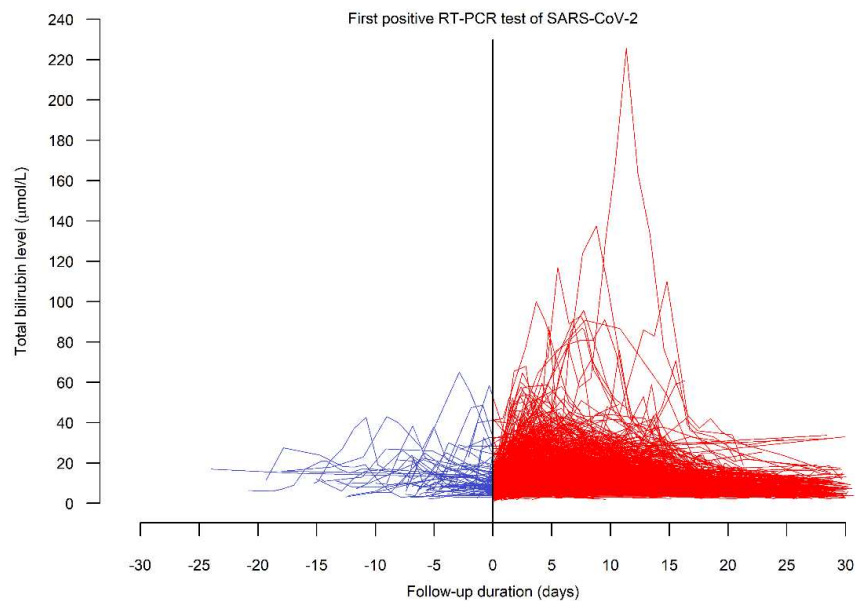

B.

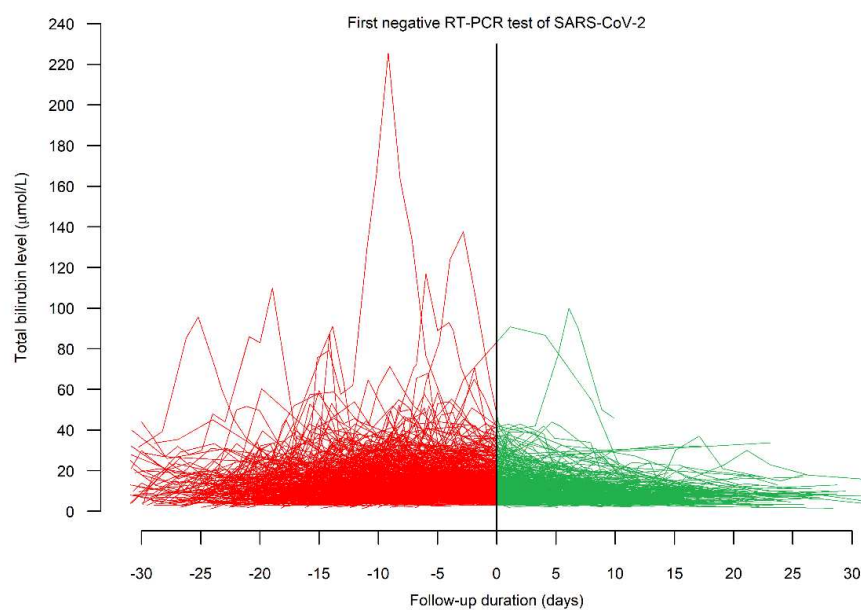



Supplementary Figure 5. Serial serum alkaline phosphatase (ALP) of patients infected with A. SARS-CoV; B. SARS-CoV-2; and C. Other HCoV. HCoV=human coronavirus, ULN=upper limit of normal, SARS=severe acute respiratory syndrome.

A.

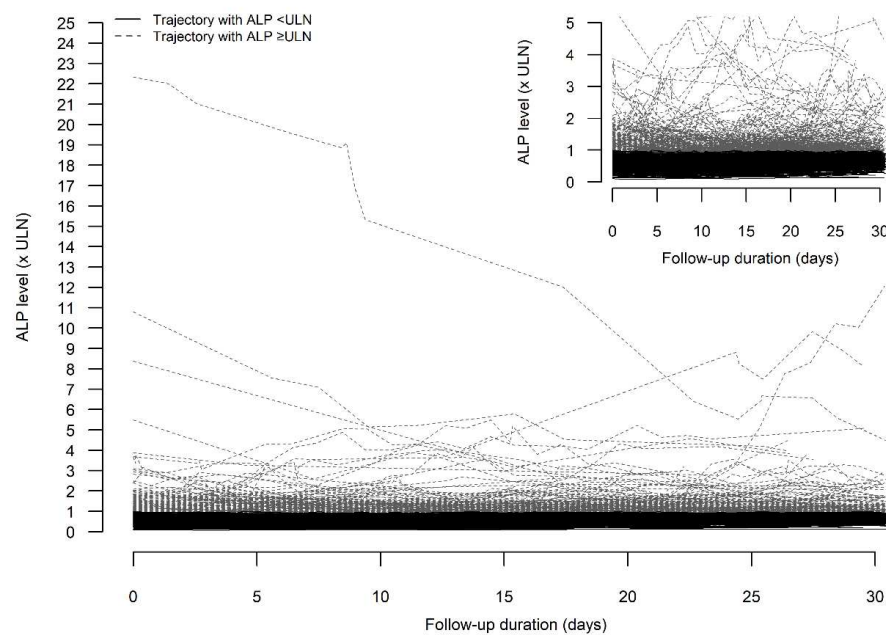

B.

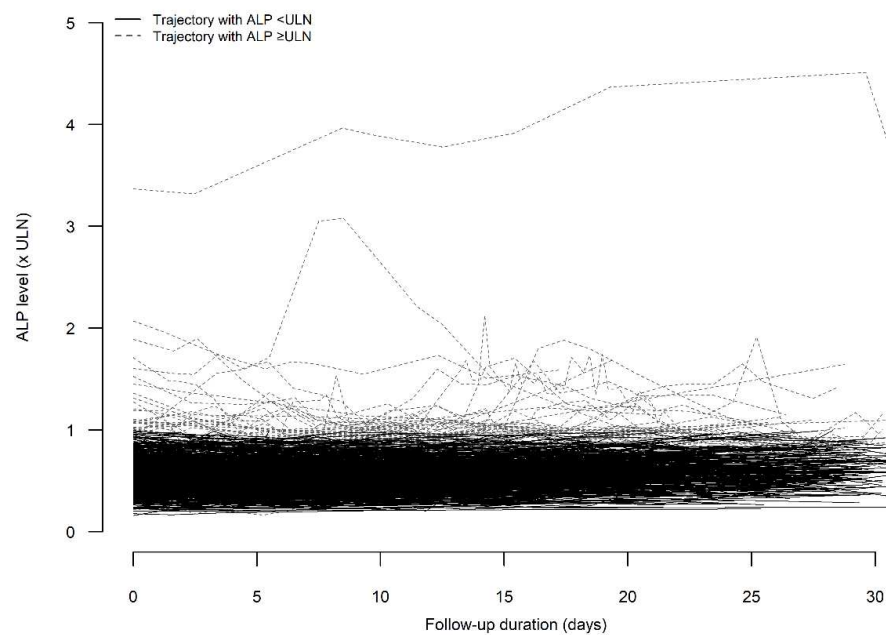

C.

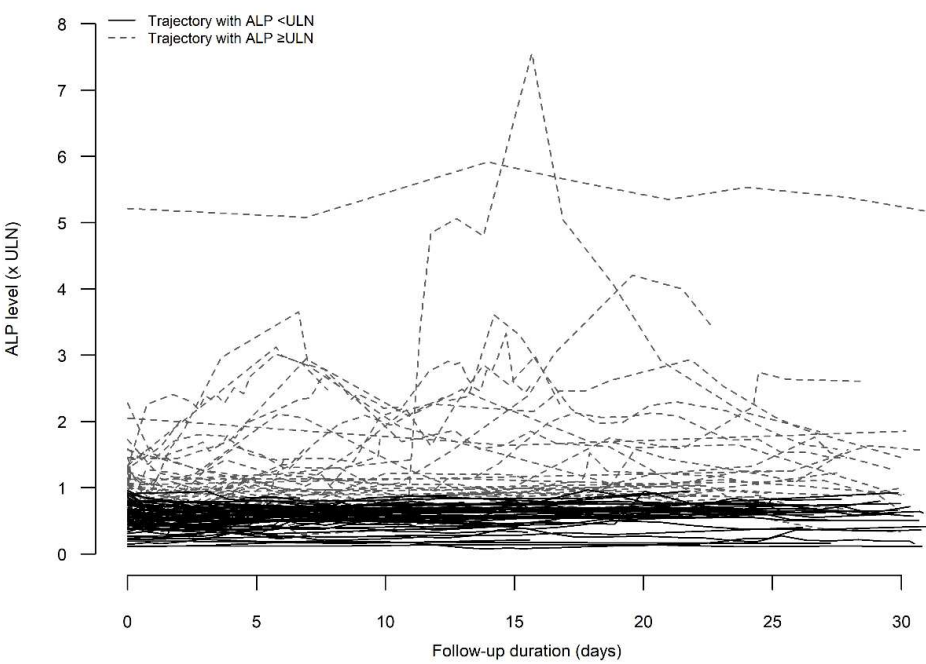

Supplementary Figure 6. Serial serum alanine aminotransferase (ALT) of patients infected with SARS-CoV-2 with reference to the time of A. start and B. end of lopinavir-ritonavir  $\pm$  ribavirin; and C. start and D. end of lopinavir-ritonavir  $\pm$  ribavirin + interferon beta.

CoV = coronavirus, SARS = severe acute respiratory syndrome.

A.

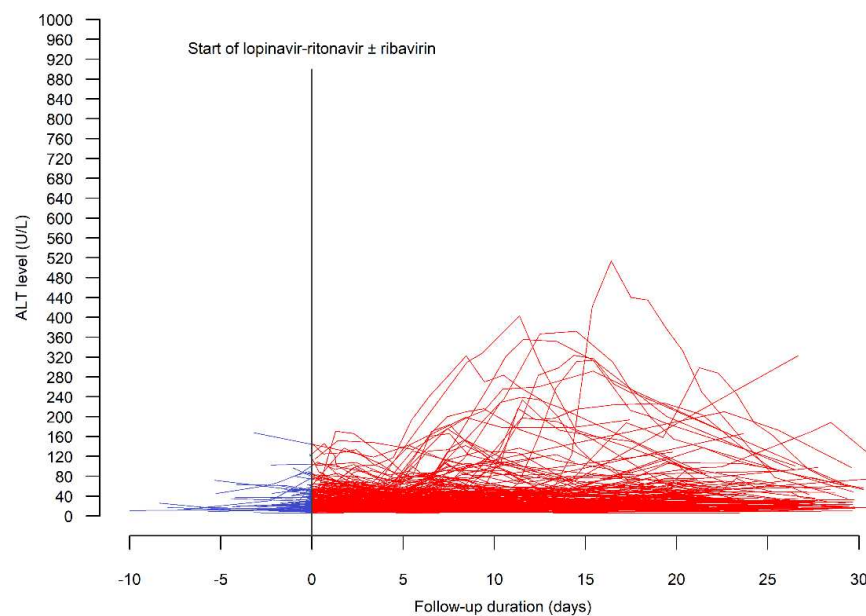

B.

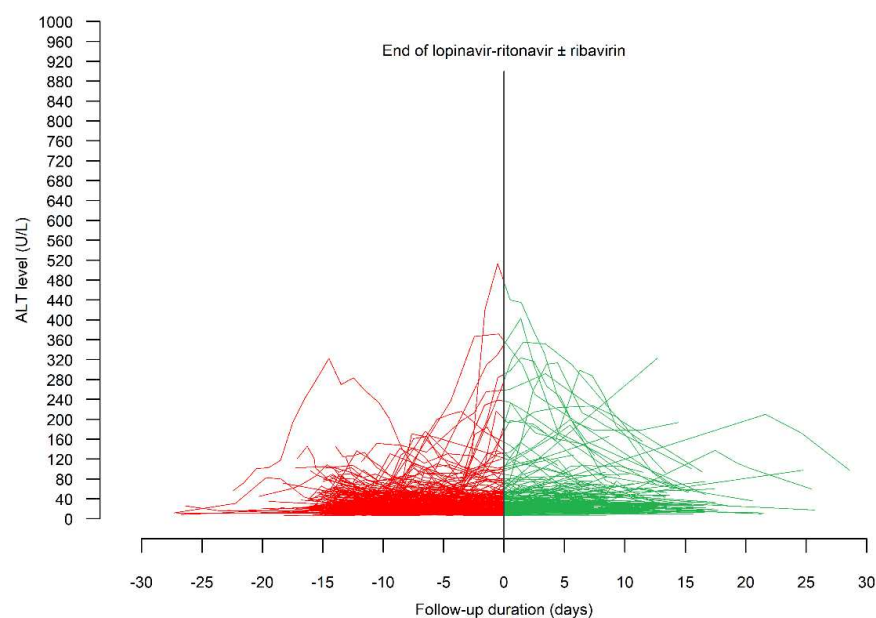

C.

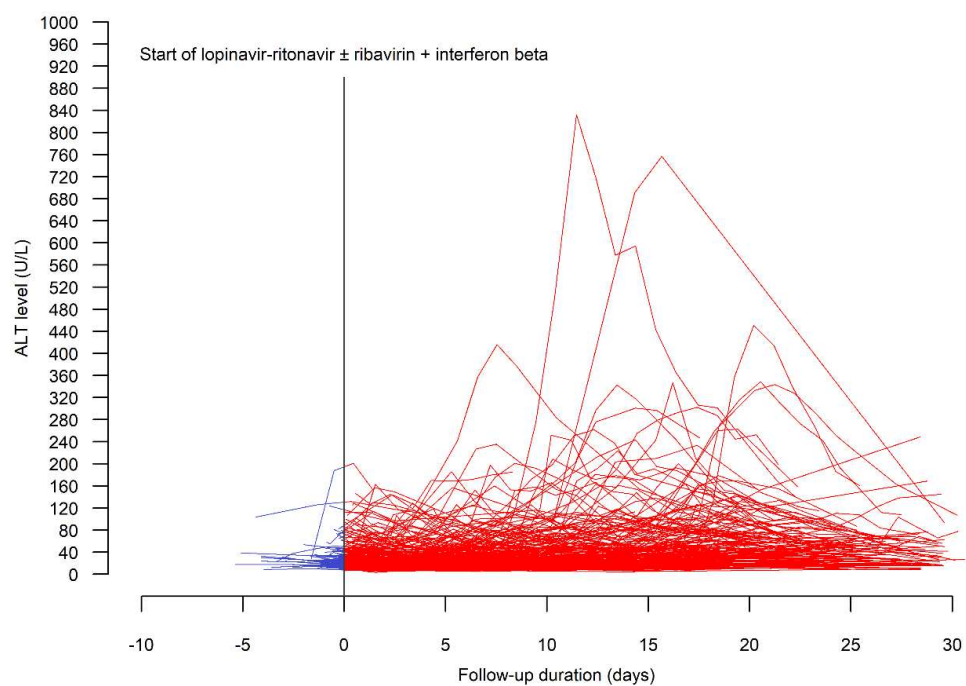

D.

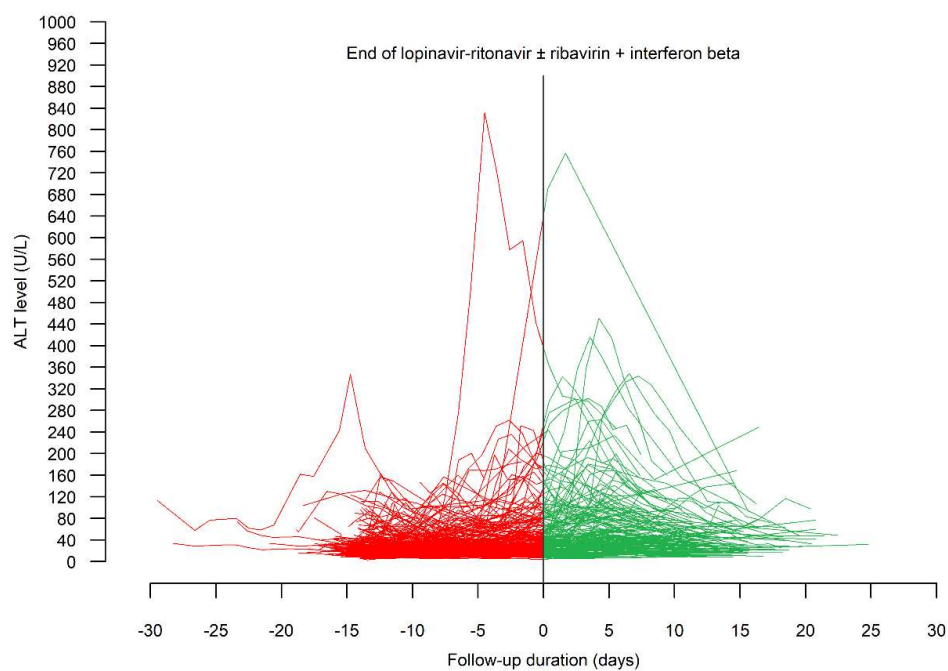

Supplementary Figure 7. Serial serum total bilirubin of patients infected with SARS-CoV-2 with reference to the time of A. start and B. end of lopinavir-ritonavir  $\pm$  ribavirin; and C. start and D. end of lopinavir-ritonavir  $\pm$  ribavirin + interferon beta.

CoV = coronavirus, SARS = severe acute respiratory syndrome.

A.

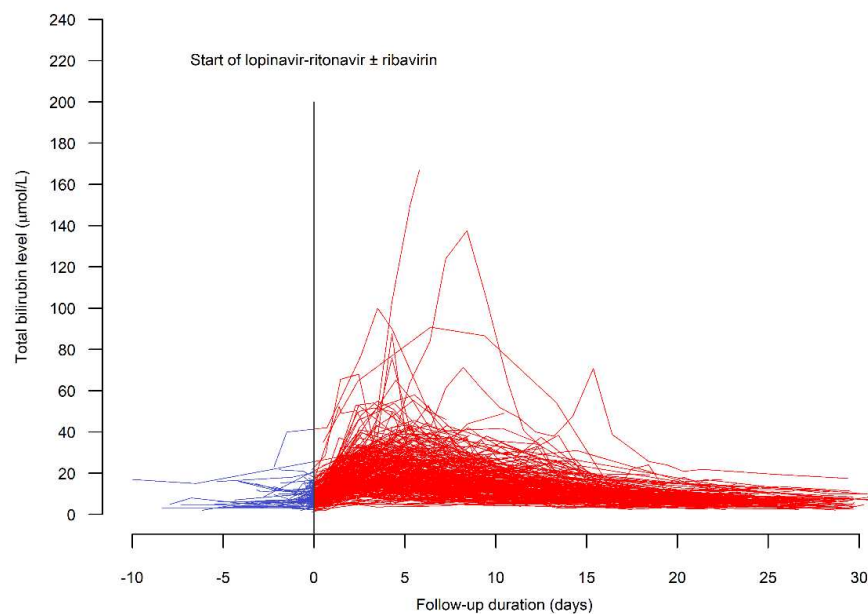

B.

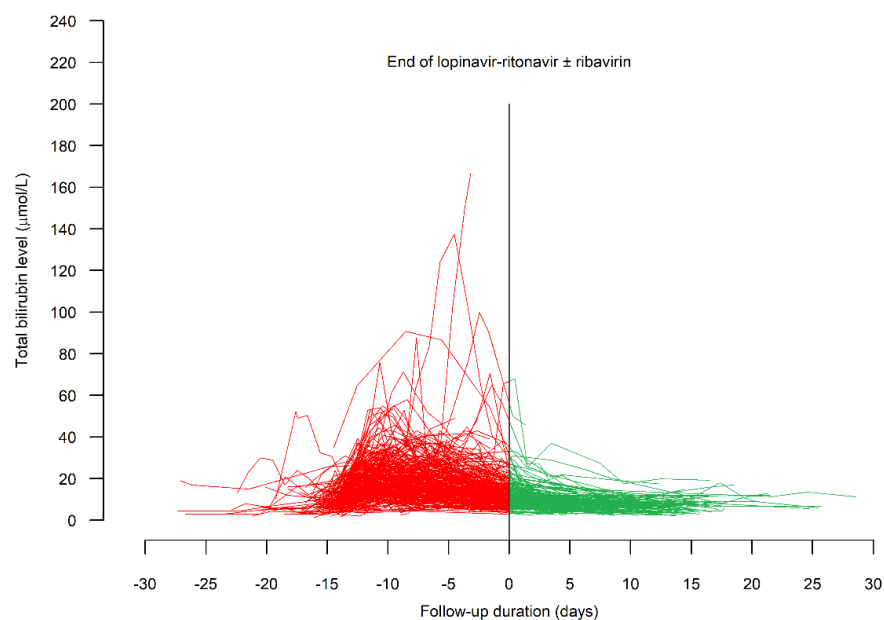

C.

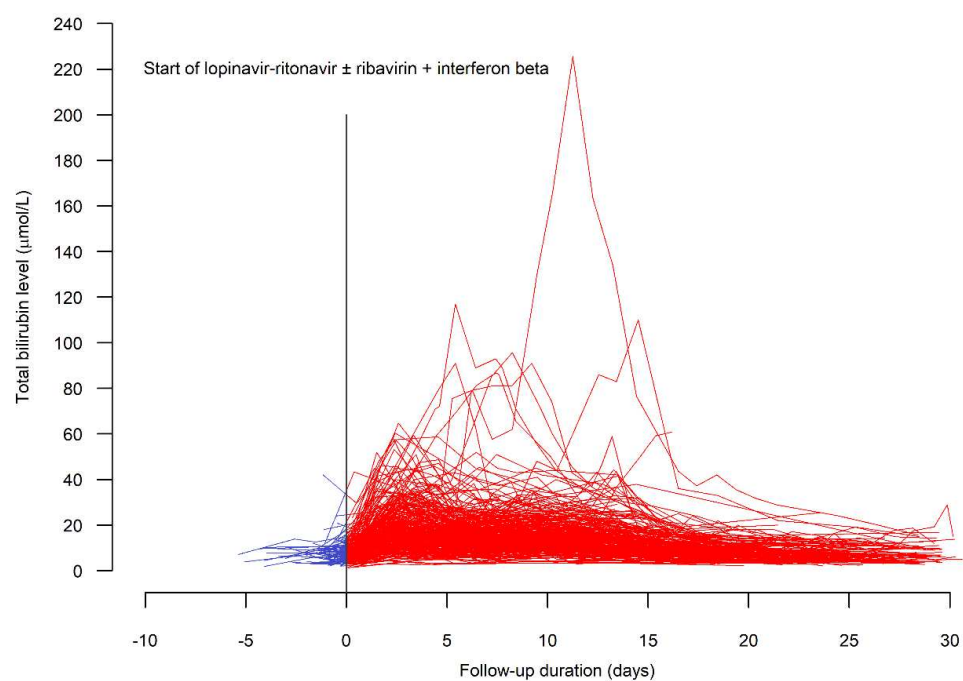

D.

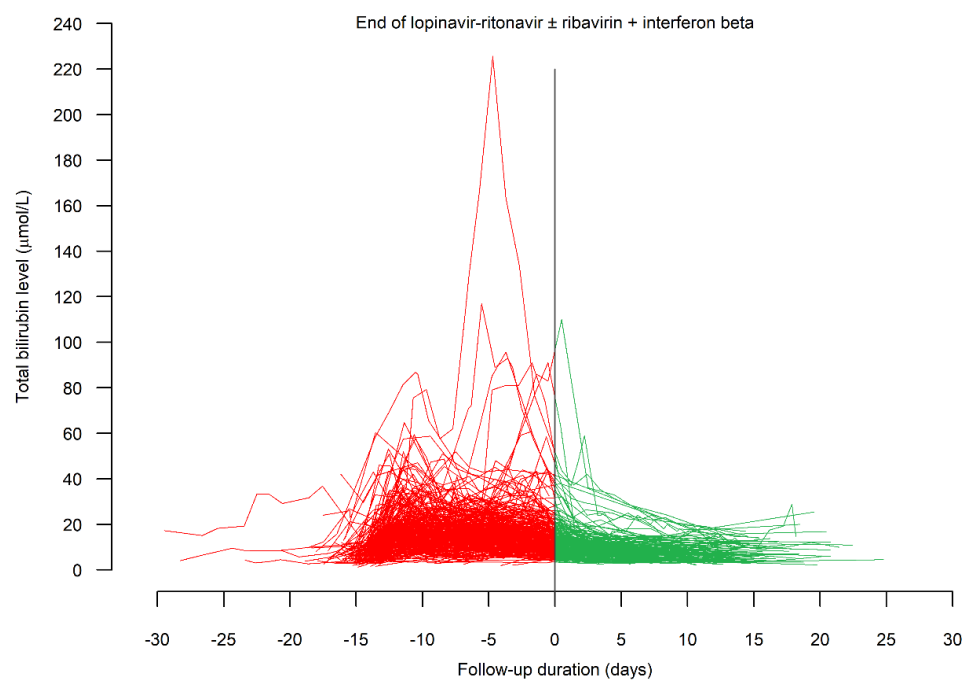

Supplementary Figure 8. Serial serum alkaline phosphatase (ALP) of patients infected with SARS-CoV-2 with reference to the time of A. start and B. end of lopinavir-ritonavir  $\pm$  ribavirin; and C. start and D. end of lopinavir-ritonavir  $\pm$  ribavirin + interferon beta.

CoV = coronavirus, SARS = severe acute respiratory syndrome.

A.

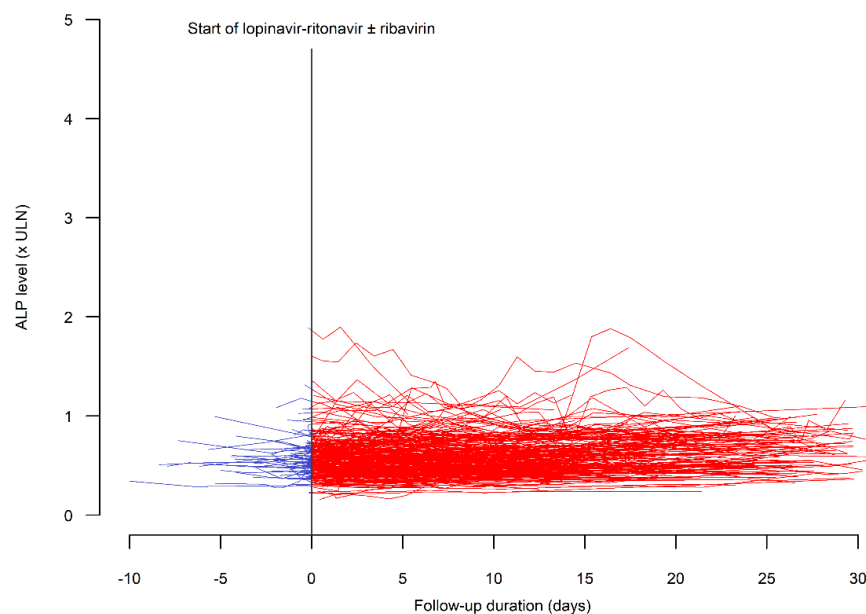

B.

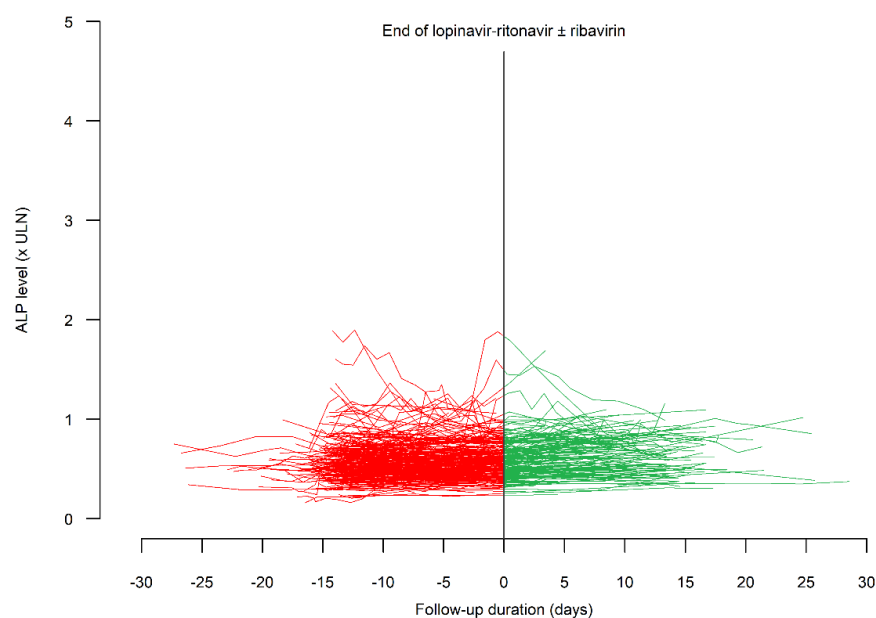

C.

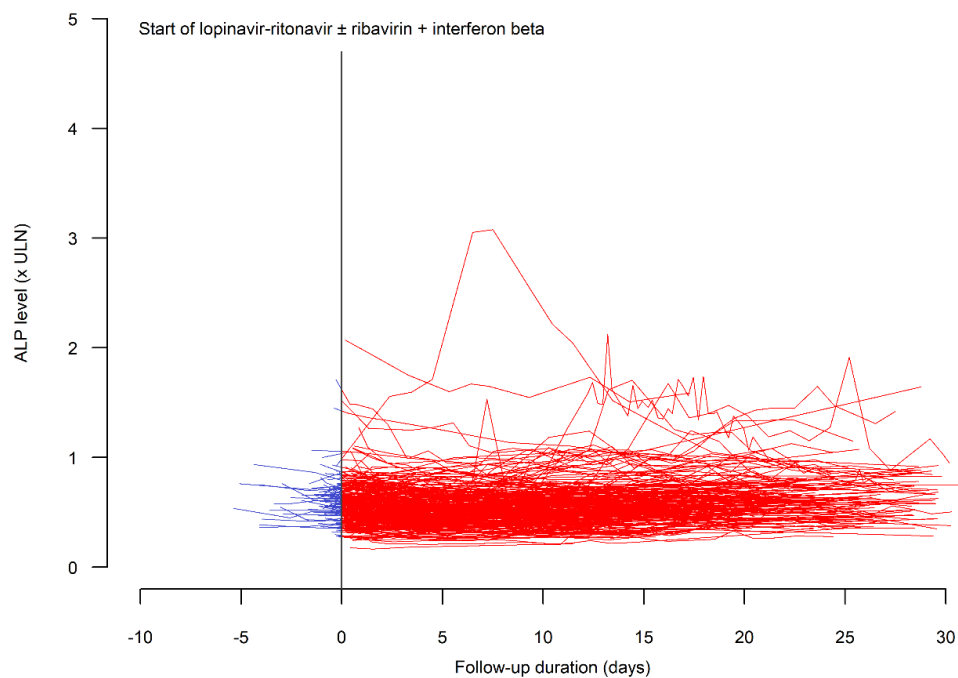

D.

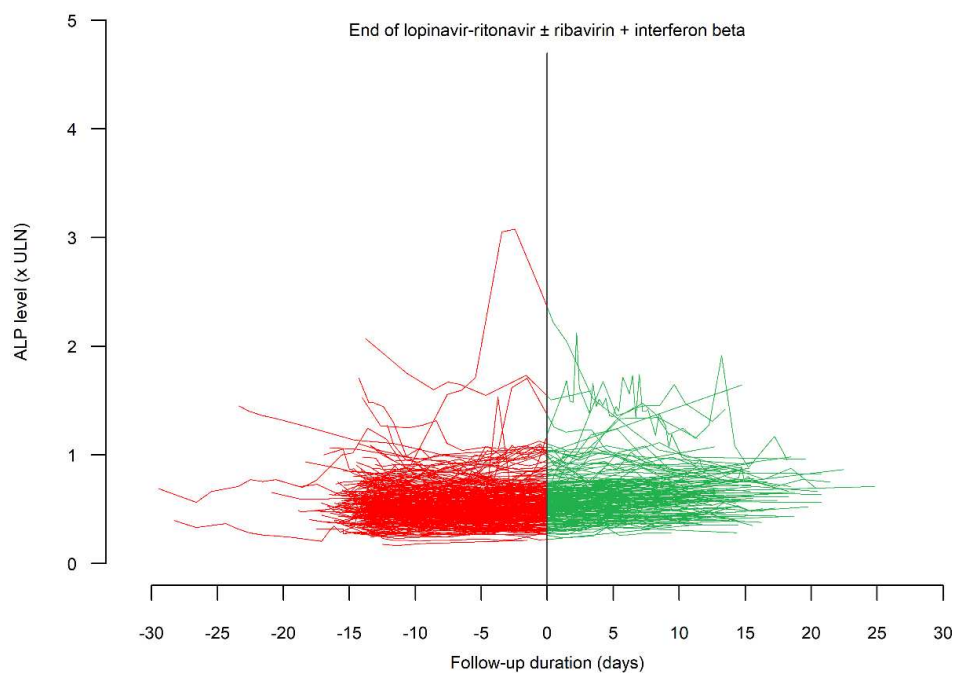

Supplement: inline-supplementary-material-1 [file inline-supplementary-material-1.pdf]
